# Supplementary material
Source: HighWire-hosted journal article supplement (https://www.jneurosci.org/content/37/36/8688)
Supplement: inline-supplementary-material-4 [file inline-supplementary-material-4.xls]

## Sheet: Ouwenga_et_al_Table5-3_SomaticT
gene_id	gene_name	chr	LogFCbyTrap	LRbyTRAP	PvaluebyTRAP	FDRbyTRAP	LogFCbyColumn	LRbyColumn	PvaluebyColumn	FDRbyColumn
ENSMUSG00000097006	9530082P21Rik	17	1.29033	27.872	1.29615e-07	7.64045e-06	-0.709502	7.50286	0.00616011	0.0207811
ENSMUSG00000000253	Gmpr	13	1.04712	12.6608	0.000373395	0.00351677	-0.720448	4.52437	0.0334154	0.0803403
ENSMUSG00000000881	Dlg3	X	0.54459	6.04848	0.0139183	0.0535398	-0.881363	14.1916	0.000165103	0.000988851
ENSMUSG00000001383	Zmat2	18	0.586111	7.43442	0.00639881	0.0299861	-0.632765	7.85756	0.00506086	0.0176706
ENSMUSG00000001445	Mrpl10	11	0.654366	6.1568	0.0130908	0.0512795	-0.815522	7.55831	0.0059734	0.0202478
ENSMUSG00000002031	Ift46	9	0.61836	5.8801	0.0153129	0.057552	-0.855008	8.41487	0.00372165	0.0137458
ENSMUSG00000002058	Unc119	11	0.740216	6.21693	0.0126535	0.0499915	-0.752141	4.32053	0.0376551	0.0878924
ENSMUSG00000002372	Ranbp3	17	0.787891	10.5958	0.00113343	0.00826551	-0.725202	6.98436	0.0082225	0.0263811
ENSMUSG00000004788	Eif2b2	12	1.11236	14.372	0.000150018	0.00174714	-1.10369	10.0146	0.00155306	0.00666021
ENSMUSG00000005370	Msh6	17	0.694215	4.78065	0.0287813	0.0923421	-0.975326	6.40719	0.0113659	0.0342275
ENSMUSG00000005469	Prkaca	8	0.769545	9.4296	0.00213511	0.0131091	-0.535462	4.36549	0.0366739	0.0859905
ENSMUSG00000005566	Trim28	7	1.07883	25.4833	4.46219e-07	2.00575e-05	-0.448424	3.95648	0.0466913	0.103948
ENSMUSG00000006024	Napa	7	0.857566	15.7666	7.16569e-05	0.00100739	-0.7101	10.099	0.00148353	0.00639468
ENSMUSG00000006273	Atp6v1b2	8	0.561111	4.04229	0.0443735	0.125818	-0.973022	11.8228	0.000585086	0.00292061
ENSMUSG00000007207	Stx1a	5	1.01298	16.5689	4.69144e-05	0.00072143	-0.762429	8.75903	0.00308074	0.0117295
ENSMUSG00000007603	Dus3l	17	0.840405	11.3608	0.000750103	0.00598657	-0.677467	5.51692	0.0188334	0.0513119
ENSMUSG00000007987	Rabl5	5	0.772093	9.70168	0.001841	0.0117916	-0.603705	4.72668	0.0296982	0.0731166
ENSMUSG00000008301	Phax	18	0.72679	9.6021	0.00194355	0.0122486	-0.674772	6.1283	0.0133035	0.038785
ENSMUSG00000009394	Syn2	6	0.475617	4.46113	0.0346746	0.105843	-0.780981	11.5271	0.000685877	0.0033363
ENSMUSG00000014504	Srp19	18	0.677134	9.73005	0.0018128	0.0116574	-0.749803	9.58175	0.00196521	0.00813575
ENSMUSG00000014873	Surf2	2	0.574736	4.08584	0.0432439	0.123464	-0.946101	7.96717	0.00476332	0.0168294
ENSMUSG00000014959	Gorasp2	2	0.828882	15.4169	8.62136e-05	0.0011622	-0.501681	5.0206	0.0250475	0.0639512
ENSMUSG00000015291	Gdi1	X	0.59849	4.82114	0.0281128	0.0905647	-0.697064	6.4271	0.0112392	0.0339297
ENSMUSG00000017299	Dnttip1	2	0.72715	5.58196	0.0181464	0.0651757	-1.01997	7.24295	0.007118	0.0233331
ENSMUSG00000018858	Ict1	11	0.700813	7.53103	0.00606451	0.0287098	-0.637753	5.02434	0.0249934	0.0638372
ENSMUSG00000019428	Fkbp8	8	1.28933	32.7371	1.05503e-08	1.15281e-06	-0.596372	6.35608	0.0116979	0.0350469
ENSMUSG00000019804	Snx3	10	0.620421	8.13882	0.00433276	0.0223145	-0.573124	6.41647	0.0113067	0.0340875
ENSMUSG00000019923	Zwint	10	0.552203	5.19945	0.022594	0.0769159	-1.09489	19.6492	9.30411e-06	7.83995e-05
ENSMUSG00000020089	Ppa1	10	1.05269	15.9367	6.5497e-05	0.000936468	-0.677955	5.70499	0.0169168	0.0471215
ENSMUSG00000020205	Phlda1	10	0.610236	6.41076	0.0113431	0.0459606	-0.814115	9.20384	0.00241508	0.00962594
ENSMUSG00000020441	2310033P09Rik	11	0.854227	4.53679	0.0331738	0.102797	-0.962416	4.26653	0.0388702	0.0900457
ENSMUSG00000020785	Camkk1	11	0.500975	5.04983	0.0246284	0.0820947	-0.677547	7.50993	0.00613599	0.0207153
ENSMUSG00000020978	Klhdc2	12	0.692453	7.82669	0.00514804	0.0252517	-0.756514	8.5885	0.00338292	0.0126868
ENSMUSG00000021018	Polr2h	16	0.866577	7.40074	0.0065197	0.0304041	-0.977277	6.68243	0.00973679	0.0302502
ENSMUSG00000021288	Klc1	12	1.12311	20.0853	7.40634e-06	0.000177435	-0.589641	5.48964	0.0191295	0.051929
ENSMUSG00000021314	Amph	13	0.441903	4.49818	0.033931	0.104331	-0.664255	9.49719	0.00205787	0.00845803
ENSMUSG00000021476	Habp4	13	0.652357	8.23862	0.00410082	0.0214039	-0.620391	6.9022	0.00860896	0.0273598
ENSMUSG00000021595	Nsun2	13	0.718192	10.0974	0.00148475	0.0100587	-0.641302	6.24509	0.0124538	0.0367603
ENSMUSG00000021645	Smn1	13	0.977953	8.42752	0.00369583	0.0197975	-1.52713	10.2969	0.00133257	0.00583019
ENSMUSG00000022212	Cpne6	14	1.3826	39.6168	3.09009e-10	7.05388e-08	-0.69162	9.16714	0.00246399	0.00977739
ENSMUSG00000022761	Lztr1	16	0.96915	20.8757	4.90062e-06	0.000130683	-0.478388	4.45958	0.034706	0.0825218
ENSMUSG00000023018	Smarcd1	15	0.499643	4.7159	0.0298849	0.0952009	-0.559475	5.36793	0.0205102	0.054694
ENSMUSG00000023277	Twf2	9	1.01429	12.5288	0.000400733	0.00373298	-0.777895	5.57144	0.0182558	0.0500423
ENSMUSG00000023707	Ogfod2	5	0.631411	4.17356	0.0410595	0.119164	-0.925251	5.93903	0.0148091	0.0423626
ENSMUSG00000024065	Ehd3	17	1.12935	19.7874	8.65506e-06	0.000198167	-0.706813	7.28168	0.00696615	0.0229369
ENSMUSG00000024271	Elp2	18	0.870974	13.2701	0.00026967	0.00272713	-0.531271	4.19077	0.0406446	0.0930127
ENSMUSG00000024277	Mapre2	18	0.588966	7.17428	0.0073956	0.0334557	-0.641653	8.26726	0.00403664	0.0147012
ENSMUSG00000024403	Atp6v1g2	17	0.732337	9.8478	0.00170035	0.0110914	-0.794478	11.3585	0.000751038	0.00361143
ENSMUSG00000024560	Cxxc1	18	0.838329	11.9223	0.000554646	0.00477957	-0.787741	8.1274	0.00436012	0.0156617
ENSMUSG00000025178	Pi4k2a	19	0.55289	5.2398	0.0220758	0.075477	-0.529241	4.24719	0.0393154	0.0906984
ENSMUSG00000025372	Baiap2	11	0.539802	4.58511	0.0322509	0.100623	-0.63071	6.04549	0.0139419	0.0403225
ENSMUSG00000025410	Dctn2	10	0.893885	13.9194	0.000190814	0.00209351	-0.548474	4.91687	0.0265957	0.0670504
ENSMUSG00000025439	Clns1a	7	0.633985	8.92072	0.00281953	0.016192	-0.635886	7.42687	0.00642571	0.0215091
ENSMUSG00000025485	Ric8	7	0.71598	10.0204	0.00154815	0.0103825	-0.707705	7.3386	0.00674893	0.0223909
ENSMUSG00000026511	Srp9	1	0.685877	4.39653	0.0360121	0.108716	-0.692821	3.94546	0.0469981	0.104406
ENSMUSG00000026641	Usf1	1	0.654616	4.36507	0.0366829	0.110202	-0.730316	3.90659	0.0480972	0.106285
ENSMUSG00000026799	Med27	2	0.749753	6.58567	0.0102803	0.0427233	-0.81063	5.56511	0.0183219	0.050203
ENSMUSG00000026857	Ntmt1	2	1.06371	12.4885	0.000409459	0.00378743	-0.943996	6.60389	0.0101756	0.0314079
ENSMUSG00000027076	Timm10	2	0.915129	10.6302	0.00111257	0.00814428	-0.938662	8.1587	0.00428552	0.0154375
ENSMUSG00000027384	Ndufaf5	2	0.579316	4.46891	0.034517	0.105482	-1.03611	10.5483	0.00116298	0.00522582
ENSMUSG00000027401	Tgm3	2	0.973563	4.2232	0.0398748	0.116962	-2.85291	15.0354	0.000105512	0.000670174
ENSMUSG00000027951	Adar	3	0.590161	7.07067	0.00783558	0.034894	-0.59822	6.52202	0.0106547	0.0325453
ENSMUSG00000028102	Pex11b	3	0.569137	4.39454	0.0360543	0.108794	-0.832308	7.2626	0.00704054	0.0231201
ENSMUSG00000028137	Celf3	3	0.919122	15.6905	7.4596e-05	0.00104428	-0.493108	4.06761	0.043713	0.0985412
ENSMUSG00000029121	Crmp1	5	0.853874	13.5972	0.000226521	0.00238268	-0.658967	7.60845	0.00580954	0.0198022
ENSMUSG00000029223	Uchl1	5	0.977233	12.4514	0.000417677	0.00385019	-0.764586	7.49485	0.00618758	0.0208476
ENSMUSG00000029326	Enoph1	5	0.693293	7.18804	0.00733912	0.0332786	-0.707525	6.0001	0.0143051	0.0411893
ENSMUSG00000029359	Tesc	5	1.51128	28.7383	8.28506e-08	5.55609e-06	-0.800963	6.40164	0.0114015	0.0343039
ENSMUSG00000029430	Ran	5	0.499579	4.38456	0.0362658	0.109261	-0.512742	3.98527	0.0458998	0.102627
ENSMUSG00000029559	2210016L21Rik	5	0.893497	15.6278	7.71141e-05	0.00106847	-0.542638	5.03847	0.0247904	0.0634996
ENSMUSG00000029581	Fscn1	5	0.741254	12.0454	0.000519198	0.00455465	-0.662922	8.72795	0.00313368	0.011894
ENSMUSG00000029599	Ddx54	5	0.828976	10.6978	0.00107263	0.00793439	-0.603538	4.12412	0.042276	0.0960427
ENSMUSG00000029621	Arpc1a	5	0.586804	6.45421	0.011069	0.0451839	-0.60787	6.47345	0.0109498	0.0332482
ENSMUSG00000029757	Dync1i1	6	0.934137	11.1487	0.000840925	0.00652542	-0.662685	5.07567	0.0242638	0.0625112
ENSMUSG00000030037	Mrpl53	6	0.791438	8.68591	0.00320679	0.0177949	-0.607241	3.97013	0.0463143	0.103331
ENSMUSG00000030161	Gabarapl1	6	0.522712	5.57235	0.0182463	0.065412	-0.754772	11.1593	0.000836135	0.00395135
ENSMUSG00000030291	Med21	6	0.634245	6.64206	0.00995987	0.0417923	-0.589542	4.63203	0.0313805	0.0763908
ENSMUSG00000030323	Ift122	6	1.1918	12.8928	0.000329849	0.00320085	-0.804871	4.40231	0.0358902	0.0845957
ENSMUSG00000030374	Strn4	7	0.584474	6.75633	0.00934155	0.0399715	-0.707441	9.03086	0.0026546	0.0103896
ENSMUSG00000030519	Apba2	7	0.845602	14.0188	0.000180991	0.00202036	-0.506494	4.53843	0.0331419	0.0798401
ENSMUSG00000030685	Kctd13	7	1.19112	32.4466	1.2251e-08	1.26389e-06	-0.705629	9.71629	0.00182642	0.00763992
ENSMUSG00000030714	Ccdc101	7	0.632713	3.88786	0.0486365	0.134584	-0.844384	4.42861	0.0353414	0.0836836
ENSMUSG00000030763	Lcmt1	7	0.570972	6.66402	0.0098379	0.0414671	-0.844609	11.3373	0.000759643	0.00364759
ENSMUSG00000030774	Pak1	7	0.608893	5.29919	0.0213354	0.0736193	-1.00395	14.0029	0.000182526	0.00107783
ENSMUSG00000030868	Dctn5	7	0.577611	6.64113	0.00996506	0.0417947	-0.624272	6.77774	0.00923018	0.0289304
ENSMUSG00000031066	Usp11	X	0.869021	12.3418	0.000442932	0.00402654	-0.615207	5.68006	0.0171588	0.0476475
ENSMUSG00000031104	Rab33a	X	0.965478	14.4186	0.000146352	0.00171787	-0.766335	6.60356	0.0101775	0.0314079
ENSMUSG00000031753	Cog4	8	1.27514	27.3471	1.70019e-07	9.48156e-06	-0.581686	4.46392	0.034618	0.0824063
ENSMUSG00000031787	Katnb1	8	1.07545	21.7374	3.12633e-06	9.3066e-05	-0.588988	4.82054	0.0281226	0.0700588
ENSMUSG00000031820	Babam1	8	1.21029	23.4268	1.29756e-06	4.67539e-05	-0.578329	4.22183	0.0399072	0.091745
ENSMUSG00000031837	Necab2	8	0.732188	7.79182	0.00524833	0.0256644	-1.04862	12.7931	0.000347908	0.00188753
ENSMUSG00000032078	Zfp259	9	0.728047	8.17478	0.00424768	0.0219708	-0.612732	4.32938	0.0374598	0.0875583
ENSMUSG00000032178	Ilf3	9	0.51227	4.20008	0.0404222	0.118026	-0.603539	5.14705	0.0232859	0.0604291
ENSMUSG00000032615	Nt5m	11	0.504942	4.2847	0.0384569	0.114148	-0.588154	4.73047	0.0296328	0.0729824
ENSMUSG00000032802	Srxn1	2	0.53619	4.34706	0.0370729	0.11107	-0.623539	5.06309	0.0244406	0.0628553
ENSMUSG00000032966	Fkbp1a	2	0.528319	5.15459	0.023185	0.0784732	-0.834214	12.4054	0.000428095	0.00225366
ENSMUSG00000033423	Eri3	4	0.814074	13.9936	0.000183433	0.00203664	-0.674283	8.11117	0.00439933	0.0157714
ENSMUSG00000033653	Vps8	16	0.803316	10.1965	0.00140708	0.00970297	-0.697526	5.92738	0.0149074	0.0425653
ENSMUSG00000033706	Smyd5	6	0.703548	5.45923	0.0194652	0.0685747	-0.685964	3.91971	0.0477231	0.105667
ENSMUSG00000033730	Egr3	14	0.727253	6.12486	0.0133294	0.0519568	-0.694972	4.35346	0.0369338	0.0864491
ENSMUSG00000034209	Rasl10a	11	1.02777	13.307	0.000264419	0.0026821	-0.785112	5.75638	0.0164288	0.0460487
ENSMUSG00000034216	Vps18	2	1.18699	24.3289	8.12118e-07	3.22221e-05	-1.07974	13.3626	0.000256688	0.00144892
ENSMUSG00000034259	Exosc4	15	1.28681	16.2912	5.43165e-05	0.000812932	-0.764447	4.35449	0.0369114	0.0864304
ENSMUSG00000034295	Fhod3	18	0.588488	7.95795	0.00478766	0.0240008	-0.669413	8.21219	0.004161	0.0150738
ENSMUSG00000034336	Ina	19	0.982654	11.2528	0.000795021	0.00625224	-0.607127	4.25444	0.0391479	0.0904444
ENSMUSG00000035027	Map2k2	10	0.851604	9.45138	0.0021099	0.0130138	-0.614297	4.07361	0.043558	0.0982578
ENSMUSG00000035456	Prdm8	5	0.97378	11.0402	0.00089158	0.00682173	-1.03085	10.4816	0.00120571	0.00539258
ENSMUSG00000035530	Eif1	11	0.588239	6.06367	0.0137991	0.0532602	-0.54606	4.72265	0.0297679	0.073248
ENSMUSG00000035790	Cep19	16	0.588412	4.05833	0.0439541	0.124946	-0.659502	4.51809	0.0335383	0.0805495
ENSMUSG00000036270	Edc4	8	0.910973	12.8375	0.000339742	0.00327086	-0.740033	6.85137	0.00885734	0.0280166
ENSMUSG00000036435	Exoc1	5	0.80941	10.2446	0.00137087	0.00949091	-0.808074	7.93066	0.0048604	0.0171005
ENSMUSG00000036613	Tssc1	12	0.6828	6.39483	0.0114453	0.0462911	-0.79481	6.78056	0.00921562	0.0289098
ENSMUSG00000036617	Etl4	2	0.544397	6.29587	0.012102	0.0484223	-0.674438	9.16151	0.00247158	0.00979651
ENSMUSG00000037296	Lsm1	8	0.856696	8.94471	0.00278274	0.0160446	-1.10256	10.6598	0.0010949	0.00496471
ENSMUSG00000037692	Ahdc1	4	1.0553	20.3123	6.57767e-06	0.000163408	-0.577815	4.48572	0.0341791	0.0816943
ENSMUSG00000038244	Mical2	7	1.01869	16.7874	4.18095e-05	0.000660305	-0.555655	4.96406	0.0258794	0.0656138
ENSMUSG00000038418	Egr1	18	0.730527	5.31264	0.0211712	0.0732501	-0.826364	6.71153	0.00957916	0.0298502
ENSMUSG00000038619	Ensa	3	0.565695	6.16766	0.0130106	0.0510214	-1.07676	20.7469	5.24173e-06	4.74723e-05
ENSMUSG00000038884	A230050P20Rik	9	1.03768	6.08216	0.0136554	0.0528138	-1.214	4.69686	0.0302179	0.0741651
ENSMUSG00000039041	Adrm1	2	1.11653	10.908	0.000957502	0.00721751	-0.911735	4.25815	0.0390626	0.0903149
ENSMUSG00000039656	Rxrb	17	0.821528	10.122	0.0014651	0.00997009	-0.847093	7.94144	0.00483153	0.0170346
ENSMUSG00000040506	Ambra1	2	0.582595	4.50091	0.0338769	0.104259	-0.836394	8.03121	0.0045978	0.01634
ENSMUSG00000040532	Abhd11	5	0.679778	5.72139	0.0167594	0.0615092	-0.981515	8.35022	0.0038564	0.0141496
ENSMUSG00000040877	Wdr25	12	1.53949	9.00631	0.0026905	0.0156267	-1.49238	3.91713	0.0477965	0.105778
ENSMUSG00000041216	Clvs1	4	0.638181	4.2388	0.0395102	0.116222	-1.03965	8.46015	0.00363012	0.0134776
ENSMUSG00000041632	Mrps27	13	0.897377	8.69458	0.00319157	0.0177398	-0.759012	4.41904	0.0355401	0.084045
ENSMUSG00000041992	Rapgef5	12	0.515154	4.26203	0.0389733	0.115146	-0.556668	4.40547	0.0358239	0.0844986
ENSMUSG00000042303	Sgsm3	15	0.955469	15.2803	9.26768e-05	0.00122355	-0.697716	5.98752	0.0144074	0.0414372
ENSMUSG00000042540	Acot5	12	1.27235	3.94152	0.0471083	0.131438	-2.67285	4.9898	0.0254971	0.0648159
ENSMUSG00000042675	Ypel3	7	0.839229	13.5968	0.000226568	0.00238268	-0.718546	9.28077	0.00231572	0.00930443
ENSMUSG00000044117	2900011O08Rik	16	0.916107	15.2711	9.31326e-05	0.00122748	-0.712854	9.02026	0.00267004	0.0104439
ENSMUSG00000046058	Eid2	7	0.692913	6.25649	0.0123739	0.0491593	-0.932231	8.24586	0.0040845	0.0148247
ENSMUSG00000046432	Ngfrap1	X	1.24653	30.6078	3.15816e-08	2.60403e-06	-0.706961	9.23806	0.00237035	0.00948142
ENSMUSG00000048264	Dip2c	13	0.450974	4.31428	0.0377938	0.112686	-0.444091	3.8527	0.049666	0.108892
ENSMUSG00000049097	Ankrd34a	3	1.44304	37.2463	1.04115e-09	1.99901e-07	-0.520431	4.3215	0.0376337	0.087873
ENSMUSG00000049643	2310022A10Rik	7	0.758909	8.24078	0.00409596	0.0213951	-0.990466	9.15801	0.00247631	0.0098118
ENSMUSG00000049907	Rasl11b	5	0.855229	7.01135	0.00809947	0.0357167	-0.746015	4.85503	0.0275657	0.0689776
ENSMUSG00000050821	Fam131a	16	0.747691	13.5348	0.00023418	0.00243605	-0.770968	12.519	0.000402824	0.00214414
ENSMUSG00000052293	Taf9	13	1.36082	23.1555	1.49418e-06	5.15413e-05	-0.899872	7.79335	0.00524389	0.0181879
ENSMUSG00000056895	Hist3h2ba	11	1.12165	9.43693	0.0021266	0.0130808	-0.919545	4.00507	0.0453636	0.101665
ENSMUSG00000057649	Brd9	13	0.808657	8.89766	0.00285537	0.0163581	-0.635657	4.74681	0.0293526	0.0724649
ENSMUSG00000059895	Ptp4a3	15	1.07021	14.1186	0.000171635	0.00194337	-0.724235	5.38427	0.0203191	0.0543137
ENSMUSG00000060098	Prmt7	8	0.899667	10.5129	0.00118546	0.00854295	-0.746386	5.18436	0.022791	0.0594831
ENSMUSG00000061086	Myl4	11	1.41422	19.1052	1.23707e-05	0.000259786	-0.826805	5.58099	0.0181565	0.0498515
ENSMUSG00000061118	Dnajc30	5	0.645687	3.8899	0.0485774	0.134448	-0.898424	5.0801	0.024202	0.0624208
ENSMUSG00000062190	Lancl2	6	0.541749	5.88422	0.0152772	0.0574711	-0.75107	10.2562	0.00136222	0.00594232
ENSMUSG00000062309	Rpp25	9	1.0093	9.24187	0.00236544	0.0142371	-1.09422	7.28997	0.00693405	0.022864
ENSMUSG00000063160	Numbl	7	0.847741	12.7267	0.000360467	0.0034238	-0.779711	8.53899	0.00347618	0.0129644
ENSMUSG00000066979	Bub3	7	0.673151	8.04025	0.00457493	0.0232202	-0.582771	5.03768	0.0248016	0.0635164
ENSMUSG00000068221	Pdxp	15	0.618546	6.14112	0.0132073	0.0516308	-0.799968	9.33863	0.00224374	0.0090667
ENSMUSG00000070934	Rraga	4	0.720522	6.0316	0.014052	0.0538828	-0.785433	6.65511	0.0098872	0.0306255
ENSMUSG00000071379	Hpcal1	12	0.834903	11.8428	0.000578833	0.00491752	-0.8433	8.86513	0.0029067	0.0112098
ENSMUSG00000071454	Dtnb	12	0.977639	17.4334	2.9755e-05	0.000516009	-0.590971	5.39165	0.0202334	0.0541458
ENSMUSG00000073423	Zfp414	17	0.771961	7.57601	0.00591503	0.0281409	-0.75496	5.38338	0.0203295	0.0543198
ENSMUSG00000073684	2610002J02Rik	4	0.729468	5.21871	0.0223451	0.0762422	-0.785688	4.5137	0.0336245	0.0807133
ENSMUSG00000074064	Mlycd	8	0.658988	4.15271	0.0415679	0.120222	-1.22311	10.1529	0.00144074	0.0062457
ENSMUSG00000090223	Pcp4	16	0.675177	5.21641	0.0223747	0.0763045	-0.705031	5.56879	0.0182834	0.0501079
ENSMUSG00000091898	Tnnc1	14	1.38345	9.93624	0.00162056	0.0106976	-1.39314	7.42401	0.00643593	0.0215225
ENSMUSG00000001052	Sec24b	3	0.528531	5.1437	0.0233308	0.0788648	-0.513992	4.50763	0.0337439	0.0808987
ENSMUSG00000001054	Rmnd5b	11	0.913227	15.6301	7.70181e-05	0.00106824	-0.521532	4.05321	0.0440875	0.0992523
ENSMUSG00000001120	Pcbp3	10	0.876382	12.4354	0.000421277	0.00387541	-0.781835	8.17595	0.00424495	0.0153201
ENSMUSG00000001229	Dpp9	17	0.780996	8.85548	0.00292211	0.016613	-0.56705	3.94248	0.0470814	0.104539
ENSMUSG00000001379	Apbb3	18	1.01149	10.9049	0.000959109	0.00722153	-0.759086	4.31975	0.0376724	0.0879176
ENSMUSG00000001380	Hars	18	0.598282	6.72072	0.0095299	0.0405483	-0.643913	6.5878	0.010268	0.0316011
ENSMUSG00000002608	Ccdc97	7	0.540384	4.58786	0.0321993	0.100501	-0.533598	3.86601	0.0492734	0.108279
ENSMUSG00000002949	Timm44	8	0.589418	5.36302	0.0205682	0.071627	-0.602476	4.38509	0.0362547	0.0852454
ENSMUSG00000003500	Impdh1	6	1.03686	17.584	2.74888e-05	0.000485803	-0.82758	7.75195	0.00536546	0.0185473
ENSMUSG00000003848	Nob1	8	0.686855	6.40552	0.0113766	0.0460687	-1.25061	11.8349	0.000581318	0.00290551
ENSMUSG00000004099	Dnmt1	9	0.776736	7.59868	0.00584109	0.0278878	-0.719202	5.52022	0.0187979	0.0512566
ENSMUSG00000004267	Eno2	6	0.734257	6.08308	0.0136483	0.0528138	-0.671887	5.0177	0.0250895	0.0640218
ENSMUSG00000004446	Bid	6	0.691757	4.51575	0.0335841	0.10361	-1.60337	12.2572	0.000463472	0.00240226
ENSMUSG00000004667	Polr2e	10	1.15621	12.6229	0.000381051	0.00358135	-0.958806	7.09793	0.00771732	0.025011
ENSMUSG00000005986	Ankrd13d	19	0.613646	6.45943	0.0110365	0.0451266	-0.562244	4.1159	0.042482	0.0964079
ENSMUSG00000009013	Dynll1	5	0.758819	8.09815	0.00443105	0.022687	-0.765808	7.90895	0.00491909	0.0172708
ENSMUSG00000009549	Srp14	2	0.540866	5.72471	0.0167278	0.0614098	-0.548248	5.35749	0.0206334	0.0549135
ENSMUSG00000014633	Cmc2	8	0.727275	4.6437	0.0311677	0.0981908	-0.915296	5.25679	0.0218613	0.0575002
ENSMUSG00000015837	Sqstm1	11	0.937141	12.3972	0.000429977	0.00393122	-0.703357	6.64571	0.00993951	0.0307655
ENSMUSG00000017188	Coa3	11	0.731097	8.62293	0.00331958	0.0182593	-0.629497	5.66235	0.0173329	0.0480515
ENSMUSG00000017314	Mpp2	11	0.624938	8.89665	0.00285694	0.0163602	-0.483285	4.85913	0.0275002	0.0688531
ENSMUSG00000018287	Spag7	11	0.576573	5.82707	0.0157814	0.0588192	-0.838041	10.2791	0.00134547	0.00587877
ENSMUSG00000018659	Pnpo	11	0.605455	6.03478	0.0140267	0.053801	-1.19337	15.6789	7.50569e-05	0.00049791
ENSMUSG00000018865	Sult4a1	15	0.692099	10.0507	0.00152287	0.0102491	-0.603443	7.32886	0.00678559	0.0224802
ENSMUSG00000019082	Slc25a22	7	0.68584	8.69097	0.00319791	0.0177675	-0.718759	8.78979	0.00302922	0.0115727
ENSMUSG00000019210	Atp6v1e1	6	0.878127	10.3269	0.00131105	0.00918213	-0.646882	5.45422	0.0195212	0.0527684
ENSMUSG00000019467	Arhgef25	10	0.629135	4.99484	0.025423	0.0840968	-0.592014	3.94613	0.0469793	0.104381
ENSMUSG00000019471	Cdc37	9	1.26167	23.2877	1.39486e-06	4.89877e-05	-0.602483	4.57094	0.0325188	0.0785924
ENSMUSG00000019578	Ubxn6	17	1.11417	24.8782	6.10683e-07	2.56487e-05	-0.538914	4.87244	0.0272889	0.0684132
ENSMUSG00000020107	Anapc16	10	0.681109	8.3062	0.00395101	0.020816	-0.606906	5.41401	0.0199758	0.0536086
ENSMUSG00000020173	Cobl	11	0.713086	9.56235	0.00198609	0.0124559	-1.15345	22.2893	2.34505e-06	2.35205e-05
ENSMUSG00000020230	Prmt2	10	1.14449	15.6903	7.46075e-05	0.00104428	-0.646461	4.11077	0.0426109	0.0966566
ENSMUSG00000020235	Fzr1	10	0.920777	11.6325	0.00064809	0.00538007	-0.790702	6.66493	0.00983288	0.0304783
ENSMUSG00000020400	Tnip1	11	0.678746	5.57381	0.018231	0.0653923	-0.706073	4.16057	0.0413755	0.0943479
ENSMUSG00000020737	Hn1	11	0.749139	8.02523	0.00461303	0.0233342	-0.68016	5.7821	0.0161901	0.0454979
ENSMUSG00000020740	Gga3	11	0.781608	8.83342	0.00295764	0.0167583	-1.44483	22.973	1.64295e-06	1.72375e-05
ENSMUSG00000020780	Srp68	11	0.662786	9.21248	0.00240371	0.0143773	-0.575328	5.67688	0.0171899	0.047724
ENSMUSG00000020882	Cacnb1	11	1.09224	20.4391	6.156e-06	0.000153785	-0.823713	10.1125	0.00147266	0.00635916
ENSMUSG00000021114	Atp6v1d	12	0.695438	8.2749	0.00401968	0.0210951	-0.485395	3.86795	0.0492165	0.108189
ENSMUSG00000021196	Pfkp	13	0.651025	5.95359	0.0146873	0.0556991	-0.951984	11.9405	0.000549255	0.00276997
ENSMUSG00000021493	Pdlim7	13	1.02849	9.21798	0.00239649	0.0143597	-0.860737	5.38462	0.020315	0.0543133
ENSMUSG00000021743	Fezf2	14	0.904067	12.2999	0.000452984	0.00409444	-0.639072	5.31016	0.0212014	0.0561362
ENSMUSG00000021748	Pdhb	14	0.610906	7.0478	0.00793629	0.0352491	-0.890863	13.4864	0.000240301	0.00136445
ENSMUSG00000021807	2700060E02Rik	14	0.621515	7.03286	0.00800276	0.0354272	-0.728413	7.06909	0.0078425	0.0253434
ENSMUSG00000021814	Anxa7	14	0.540349	3.92383	0.0476063	0.132415	-0.65389	4.92092	0.0265333	0.0669434
ENSMUSG00000022099	Dmtn	14	0.661378	8.84356	0.00294125	0.0166936	-0.627087	7.57567	0.00591614	0.0201044
ENSMUSG00000022442	Ttll1	15	1.05546	19.4205	1.04877e-05	0.000230436	-0.87675	10.9757	0.000923161	0.00429169
ENSMUSG00000022540	Rogdi	16	1.07159	25.2631	5.00179e-07	2.18971e-05	-0.591494	6.97436	0.00826858	0.0265099
ENSMUSG00000022570	Tsta3	15	0.879377	9.7	0.00184268	0.0117931	-0.796835	4.88867	0.0270335	0.0679504
ENSMUSG00000022658	Tagln3	16	1.04939	24.3438	8.05874e-07	3.22221e-05	-0.75867	11.8082	0.000589715	0.00294114
ENSMUSG00000022760	Thap7	16	0.976271	9.05802	0.00261546	0.0152921	-1.11806	7.94034	0.00483446	0.0170404
ENSMUSG00000022861	Dgkg	16	0.806714	10.8367	0.000995086	0.00746731	-0.651858	6.33549	0.0118346	0.0353302
ENSMUSG00000023456	Tpi1	6	0.826002	14.9924	0.000107943	0.00136678	-0.483077	4.78641	0.0286852	0.0711208
ENSMUSG00000024426	Atat1	17	0.523886	5.32977	0.0209641	0.0726929	-0.471884	3.89178	0.048523	0.107026
ENSMUSG00000024855	Pacs1	19	0.930627	16.5387	4.76682e-05	0.000730687	-0.897634	14.0844	0.000174788	0.00103991
ENSMUSG00000024966	Stip1	19	0.770618	8.88584	0.0028739	0.016417	-0.534016	3.8837	0.048757	0.107355
ENSMUSG00000025190	Got1	19	0.553807	4.36329	0.0367213	0.110262	-0.816545	9.16766	0.00246329	0.00977739
ENSMUSG00000025474	Tubgcp2	7	0.985245	10.3257	0.00131188	0.00918319	-0.876642	6.23497	0.0125252	0.0369082
ENSMUSG00000025855	Prkar1b	5	0.868932	10.9065	0.000958299	0.00721947	-0.807969	9.28399	0.00231165	0.00929083
ENSMUSG00000026154	1110058L19Rik	1	0.827657	5.29987	0.0213271	0.0736096	-0.872587	4.45442	0.034811	0.0827045
ENSMUSG00000026277	Stk25	1	0.756776	11.9152	0.000556769	0.00479371	-0.698648	9.5053	0.0020488	0.00842332
ENSMUSG00000026437	Cdk18	1	0.754952	6.67506	0.00977712	0.0412962	-0.774245	5.59397	0.0180224	0.0495239
ENSMUSG00000026603	Smyd2	1	1.10423	20.6967	5.38096e-06	0.000139884	-0.684995	6.34123	0.0117963	0.0352786
ENSMUSG00000026750	Psmb7	2	1.02378	18.111	2.08399e-05	0.000385796	-0.528385	4.28142	0.0385312	0.0894508
ENSMUSG00000026797	Stxbp1	2	0.706372	6.23764	0.0125063	0.0495388	-0.602867	4.52166	0.0334684	0.0804472
ENSMUSG00000026825	Dnm1	2	1.16682	16.0212	6.26365e-05	0.000903255	-0.570294	3.86133	0.0494111	0.108511
ENSMUSG00000026860	Sh3glb2	2	0.823093	13.0898	0.000296907	0.00293447	-0.697548	8.54201	0.00347043	0.0129491
ENSMUSG00000026885	Ttll11	2	0.568314	5.26666	0.0217376	0.0745862	-0.607257	4.33339	0.0373718	0.0873829
ENSMUSG00000026933	Camsap1	2	0.43335	4.37011	0.0365746	0.110043	-0.578417	6.77969	0.0092201	0.0289098
ENSMUSG00000027010	Slc25a12	2	0.540097	6.11587	0.0133973	0.0521277	-0.88985	15.4663	8.39904e-05	0.000550326
ENSMUSG00000027244	Atg13	2	0.490906	4.00854	0.0452702	0.127768	-0.578909	5.03692	0.0248125	0.0635322
ENSMUSG00000027316	Gfra4	2	1.03335	18.4264	1.76593e-05	0.000339543	-0.593828	5.24601	0.0219972	0.0577541
ENSMUSG00000027327	1700037H04Rik	2	1.39455	31.1307	2.41228e-08	2.20342e-06	-0.837556	8.60152	0.00335882	0.0126096
ENSMUSG00000027489	Necab3	2	0.775251	9.4211	0.00214503	0.013158	-0.649385	6.13209	0.013275	0.0387206
ENSMUSG00000027551	Zfp64	2	0.743297	4.44238	0.0350574	0.106696	-1.11614	6.30821	0.012018	0.0357507
ENSMUSG00000027634	Ndrg3	2	0.639056	6.93402	0.00845714	0.037	-0.490548	4.03471	0.0445734	0.100145
ENSMUSG00000028005	Gucy1b3	3	0.716769	5.90019	0.0151393	0.0570942	-0.790058	6.73978	0.00942864	0.0294221
ENSMUSG00000028149	Rap1gds1	3	0.768254	11.097	0.000864663	0.00668262	-0.635652	7.37631	0.00660888	0.0220175
ENSMUSG00000028345	Tex10	4	0.605092	4.16657	0.0412293	0.119577	-0.82087	5.41333	0.0199836	0.0536086
ENSMUSG00000028398	Tmem261	4	0.805762	7.84754	0.00508899	0.0250627	-0.646638	4.09365	0.0430447	0.0974185
ENSMUSG00000028479	Gne	4	0.638455	6.8234	0.0089971	0.0388439	-0.584487	4.58064	0.0323351	0.0782046
ENSMUSG00000028785	Hpca	4	0.618163	5.28066	0.0215635	0.074178	-1.02112	13.9984	0.000182965	0.00107948
ENSMUSG00000028849	Map7d1	4	0.812654	12.6983	0.000365979	0.0034688	-0.582406	6.06887	0.0137585	0.0398866
ENSMUSG00000028953	Abcf2	5	0.873565	13.5668	0.000230218	0.00240583	-0.587772	4.75351	0.0292385	0.0722496
ENSMUSG00000029551	Psmg3	5	0.607559	4.43085	0.0352948	0.107225	-0.955081	6.65419	0.00989229	0.0306342
ENSMUSG00000029657	Hsph1	5	0.750715	8.0779	0.00448083	0.0228548	-0.634721	5.65839	0.017372	0.0481303
ENSMUSG00000029726	Mepce	5	0.528744	4.3646	0.0366931	0.110202	-0.909863	9.06908	0.00259967	0.0102073
ENSMUSG00000030350	Prmt8	6	0.454789	4.06849	0.0436903	0.124354	-0.933361	15.6775	7.51133e-05	0.000498038
ENSMUSG00000030905	Crym	7	1.0321	14.4993	0.00014021	0.001669	-0.661068	5.28883	0.0214626	0.0567048
ENSMUSG00000030986	Dhx32	7	0.724637	7.32068	0.00681654	0.0314934	-1.03845	10.159	0.00143601	0.00622779
ENSMUSG00000031078	Cttn	7	0.58898	5.86997	0.0154013	0.0577872	-0.922178	10.9974	0.000912412	0.00424613
ENSMUSG00000031774	Fam192a	8	0.662353	8.77393	0.00305567	0.0171977	-0.873733	11.3069	0.000772198	0.0036999
ENSMUSG00000031796	Gtl3	8	0.812778	12.8783	0.000332406	0.00321406	-0.644232	6.0544	0.0138717	0.0401715
ENSMUSG00000031955	Bcar1	8	0.806784	9.1632	0.0024693	0.0146523	-0.763992	6.29818	0.0120862	0.0359138
ENSMUSG00000031972	Acta1	8	1.15417	13.9202	0.000190741	0.00209351	-1.41451	11.5125	0.000691283	0.00336016
ENSMUSG00000032101	Ddx25	9	0.912522	10.7927	0.00101903	0.00762148	-0.98587	9.24909	0.00235612	0.00943573
ENSMUSG00000032299	Commd4	9	0.653813	8.23174	0.00411641	0.0214519	-0.543934	4.45276	0.0348449	0.0827691
ENSMUSG00000032306	Mpi	9	1.29995	26.0786	3.27797e-07	1.59623e-05	-0.564973	4.20941	0.0402003	0.0922316
ENSMUSG00000032468	Armc8	9	0.432494	3.95478	0.0467385	0.130677	-0.810882	11.7202	0.000618261	0.00305718
ENSMUSG00000032480	Dhx30	9	1.12901	21.0423	4.49246e-06	0.000122224	-0.750231	7.83879	0.00511368	0.0178375
ENSMUSG00000032637	Atxn2l	7	0.486431	3.88059	0.0488473	0.135056	-0.52038	4.20225	0.0403703	0.0925267
ENSMUSG00000032834	Pwp2	10	0.711072	4.4216	0.0354867	0.107638	-0.886303	4.53545	0.0331997	0.0799648
ENSMUSG00000032870	Smap2	4	0.67469	8.95604	0.00276554	0.015966	-0.800081	11.6957	0.000626443	0.00308969
ENSMUSG00000033732	Sf3b3	8	0.695482	7.52207	0.00609476	0.0288428	-0.675398	5.90421	0.0151048	0.0429984
ENSMUSG00000034168	Irf2bpl	12	0.561093	3.98404	0.0459333	0.12907	-0.637542	3.99434	0.0456533	0.10224
ENSMUSG00000034187	Nsf	11	0.618241	4.03073	0.0446785	0.126404	-0.727897	5.53873	0.0186	0.0508202
ENSMUSG00000034341	Wbp2	11	0.702707	9.28604	0.00230907	0.0139541	-0.483627	4.21187	0.0401421	0.0921598
ENSMUSG00000034403	Pja1	X	0.881637	8.92842	0.00280768	0.0161676	-1.03147	11.5894	0.0006633	0.00324616
ENSMUSG00000034868	Myl12b	17	0.724698	10.2806	0.00134436	0.00936662	-0.705011	9.204	0.00241487	0.00962594
ENSMUSG00000034891	Sncb	13	0.979005	12.1672	0.000486373	0.00432904	-0.788891	7.18617	0.00734678	0.0239953
ENSMUSG00000035325	Sec31a	5	0.497044	5.5919	0.0180437	0.0649283	-0.549157	6.20566	0.0127342	0.0373849
ENSMUSG00000036315	Znrd1	17	0.897863	8.01662	0.004635	0.0234014	-1.03715	7.57513	0.00591791	0.0201053
ENSMUSG00000036398	Ppp1r11	17	0.65629	5.40407	0.0200898	0.070351	-0.704406	5.06464	0.0244188	0.0628113
ENSMUSG00000036940	Kdm1a	4	0.552962	7.221	0.00720555	0.0328391	-0.482359	4.7213	0.0297913	0.0732787
ENSMUSG00000036966	Spryd3	15	0.901683	9.80521	0.00174018	0.0112894	-0.797793	6.14263	0.0131961	0.0385367
ENSMUSG00000036989	Trim3	7	0.695193	8.75863	0.00308141	0.0172775	-0.761792	8.78647	0.00303473	0.0115871
ENSMUSG00000037601	Nme1	11	1.06092	19.4461	1.03477e-05	0.000228363	-0.51666	4.32766	0.0374978	0.0876014
ENSMUSG00000037984	Neurod6	6	0.59026	4.75244	0.0292568	0.0936442	-1.48864	26.5186	2.61014e-07	3.38286e-06
ENSMUSG00000038417	Fig4	10	0.576947	3.95089	0.0468465	0.130898	-0.764533	5.29931	0.0213339	0.0564646
ENSMUSG00000038500	Prr3	17	0.491383	4.04081	0.0444124	0.125876	-0.654468	5.35997	0.0206041	0.0548681
ENSMUSG00000038762	Abcf1	17	0.948309	15.6216	7.73652e-05	0.00107015	-0.596448	5.32979	0.0209639	0.0556389
ENSMUSG00000039067	Psmd7	8	0.469565	3.94265	0.0470765	0.131376	-0.555246	4.79661	0.0285157	0.0708675
ENSMUSG00000039195	1110008P14Rik	2	1.20121	27.4361	1.62369e-07	9.20778e-06	-0.591882	6.32822	0.0118832	0.0354359
ENSMUSG00000039431	Mtmr7	8	0.475449	4.04721	0.0442444	0.125585	-0.652205	6.19353	0.0128218	0.0375682
ENSMUSG00000039738	Slx4	16	0.641374	8.06349	0.00451662	0.0230062	-0.810998	9.65246	0.00189098	0.00786834
ENSMUSG00000039914	Coq10a	10	0.604693	6.0572	0.0138497	0.0533792	-1.17281	16.5684	4.69267e-05	0.000331248
ENSMUSG00000041263	Rusc1	3	0.959572	22.1438	2.52977e-06	7.76259e-05	-0.462564	4.74615	0.0293638	0.0724794
ENSMUSG00000041815	Poldip3	15	0.757697	11.2878	0.000780183	0.00616804	-0.488542	4.09237	0.0430772	0.0974185
ENSMUSG00000042111	Ccdc115	1	0.551406	4.15461	0.0415212	0.120198	-0.749625	5.46808	0.0193669	0.0524992
ENSMUSG00000042292	Mkl1	15	0.708857	9.04297	0.00263707	0.0153896	-0.641415	6.20059	0.0127708	0.0374594
ENSMUSG00000042726	Trafd1	5	0.72636	7.88005	0.00499831	0.0247157	-0.817231	7.80703	0.00520433	0.0180794
ENSMUSG00000042766	Trim46	3	0.637154	8.39972	0.00375279	0.0200467	-0.467177	4.09442	0.043025	0.0974152
ENSMUSG00000043284	Tmem11	11	0.691138	6.60979	0.0101419	0.0423053	-1.23898	14.192	0.000165075	0.000988851
ENSMUSG00000046709	Mapk10	5	0.751531	8.7387	0.00311526	0.0174309	-0.575866	5.09511	0.0239934	0.0620019
ENSMUSG00000047228	BC048546	6	1.57275	20.9392	4.74098e-06	0.000127693	-1.09017	7.30173	0.00688882	0.0227372
ENSMUSG00000047507	Baiap3	17	1.06571	4.67326	0.0306357	0.096972	-1.36211	4.18237	0.0408466	0.0933479
ENSMUSG00000047547	Cltb	13	0.692106	10.2251	0.00138539	0.0095731	-0.482284	4.48985	0.0340967	0.08157
ENSMUSG00000049792	Bag5	12	0.517121	5.09792	0.0239545	0.0804268	-0.853991	10.7801	0.00102598	0.00469816
ENSMUSG00000050751	Pgbd5	8	0.794753	13.8833	0.000194523	0.00212157	-0.667738	9.34256	0.00223892	0.00905488
ENSMUSG00000051391	Ywhag	5	0.631412	4.78725	0.0286712	0.0920766	-0.657541	5.15548	0.0231732	0.0601712
ENSMUSG00000052837	Junb	8	0.870496	5.63099	0.0176456	0.0638378	-0.891558	3.86415	0.0493282	0.108364
ENSMUSG00000052981	Ube2ql1	13	0.817024	13.2245	0.00027631	0.00278173	-0.520022	5.09308	0.0240215	0.0620505
ENSMUSG00000053137	Mapk11	15	0.506887	4.38753	0.0362028	0.109144	-1.29537	20.9109	4.81156e-06	4.42321e-05
ENSMUSG00000054034	Tceal5	X	0.937807	14.8011	0.000119465	0.00147846	-0.693099	6.68075	0.00974597	0.0302577
ENSMUSG00000055044	Pdlim1	19	1.18003	6.15239	0.0131234	0.0513626	-1.39421	4.79305	0.0285748	0.0709879
ENSMUSG00000056962	Jmjd6	11	1.03038	8.92265	0.00281655	0.016191	-0.843661	4.26024	0.0390145	0.0902401
ENSMUSG00000059456	Ptk2b	14	0.930252	9.5108	0.00204266	0.0126864	-0.924205	8.99323	0.00270982	0.0105749
ENSMUSG00000061360	Phf5a	15	0.987039	15.3023	9.16045e-05	0.00121178	-0.86822	8.25401	0.0040662	0.0147742
ENSMUSG00000063576	Klhdc3	17	1.02449	16.5726	4.6823e-05	0.00072143	-0.642546	5.70594	0.0169076	0.0471058
ENSMUSG00000064181	Rab3ip	10	0.702216	7.13481	0.00756017	0.0339912	-1.02637	11.5695	0.000670424	0.00327535
ENSMUSG00000066357	Wdr6	9	1.15088	19.2494	1.14709e-05	0.000245884	-0.721845	5.9284	0.0148988	0.0425499
ENSMUSG00000068739	Sars	3	0.73301	8.4936	0.00356399	0.0192834	-0.609947	5.19656	0.0226317	0.0591542
ENSMUSG00000071658	Gng3	19	1.37048	26.1326	3.18753e-07	1.55783e-05	-0.587968	4.83713	0.0278533	0.0695271
ENSMUSG00000071662	Polr2g	19	0.997966	16.524	4.80377e-05	0.000734501	-0.530392	3.96363	0.0464934	0.103627
ENSMUSG00000072214	2017-09-05	16	1.15431	24.2119	8.62978e-07	3.39135e-05	-0.525047	4.74391	0.0294021	0.0725471
ENSMUSG00000078812	Eif5a	11	0.863853	16.4111	5.09847e-05	0.000773402	-0.492815	4.68012	0.0305135	0.0747407
ENSMUSG00000079657	Rab26	17	0.69446	6.30308	0.0120528	0.0482688	-1.03097	10.3649	0.00128436	0.00566773
