# Supplementary material
Source: HighWire-hosted journal article supplement (https://www.jneurosci.org/content/37/36/8688)
Supplement: inline-supplementary-material-8 [file inline-supplementary-material-8.xls]

## Sheet: Ouwenga_et_al_Table10-2_Somatic
event_type	event_id	gene_symbol	dPSI_SNF_WCH	dPSI_TRAP_WCH	p_val_SNF_WCH	p_val_TRAP_WCH	FDR_SNF_WCH	FDR_TRAP_WCH
A5SS	chr8:72836605:72836683|72836679:+@chr8:72836758:72836895:+	Cope	0.0733333	-0.04	0.0432	0.0186	0.227536	0.30876
A5SS	chr11:69731523:69731419|69731415:-@chr11:69730930:69731230:-	Eif5a	0.163333	-0.0166667	0.0134	0.048	0.227536	0.328505
A5SS	chr7:34987722:34987656|34987652:-@chr7:34986346:34987568:-	Gpi1	0.05	-0.0133333	0.0188	0.0122	0.227536	0.30876
AFE	381290@uc007cqu.1@uc007cqx.1	Atp2b4	-0.0866667	0.0966667	0.0402	0.0248	0.422333	0.24926
AFE	66587@uc008wrn.1@uc008wro.1-uc008wrq.1	Fastk	0.1	-0.03	0.0132	0.0492	0.422333	0.249808
AFE	227743@uc008jin.1@uc008jil.1	Mapkap1	0.0633333	-0.0333333	0.0212	0.0464	0.422333	0.24926
AFE	64291@uc008ecq.1@uc008ecv.1	Osbpl1a	0.06	-0.0133333	0.0158	0.0106	0.422333	0.24926
AFE	268859@uc007yci.1@uc007ycf.1-uc007ycg.1-uc007ych.1	Rbfox1	0.113333	-0.00666667	0.0476	0.023	0.422333	0.24926
AFE	66660@uc009qom.1@uc009qoh.1-uc009qoi.1-uc009qok.1-uc009qol.1	Sltm	0.11	-0.17	0.0326	0.0212	0.422333	0.24926
AFE	70834@uc007kya.1-uc007kyb.1-uc007kyc.1-uc007kyd.1@uc007kxv.1-uc007kxx.1-uc007kxy.1	Spag9	-0.113333	0.22	0.0158	0.012	0.422333	0.24926
AFE	70834@uc007kya.1-uc007kyb.1-uc007kyc.1-uc007kyd.1@uc007kxw.1	Spag9	-0.113333	0.193333	0.0402	0.0212	0.422333	0.24926
AFE	223435@uc007vjv.1@uc007vjw.1	Trio	0.0966667	-0.01	0.0134	0.0316	0.422333	0.24926
ALE	71675@uc007ifi.1@uc007ifh.1	0610010F05Rik	0.11	-0.0933333	0.0228	0.0264	0.270954	0.199272
ALE	17222@uc008mgs.1@uc008mgq.1	Anapc1	0.16	-0.143333	0.023	0.0236	0.270954	0.1988
ALE	11735@uc007fnl.1@uc007fni.1	Ank3	0.0433333	-0.0666667	0.0472	0.03	0.272618	0.200996
ALE	65973@uc008ryi.1@uc008ryf.1-uc008ryg.1-uc008ryh.1	Asph	-0.323333	0.0566667	0.015	0.025	0.270954	0.199272
ALE	65973@uc008rym.1-uc008ryn.1@uc008ryf.1-uc008ryg.1-uc008ryh.1	Asph	-0.216667	0.18	0.0224	0.0294	0.270954	0.200996
ALE	319845@uc009oov.1@uc009oor.1-uc009oos.1-uc009oot.1-uc009oou.1	Bbs9	0.233333	-0.09	0.0184	0.0274	0.270954	0.200492
ALE	12464@uc007ien.1@uc007ieo.1	Cct4	0.03	-0.0266667	0.033	0.0242	0.270954	0.199272
ALE	12540@uc008viy.1@uc008viw.1	Cdc42	0.15	-0.116667	0.0152	0.0132	0.270954	0.197339
ALE	12540@uc008viy.1@uc008vix.1	Cdc42	0.146667	-0.116667	0.0162	0.0116	0.270954	0.197339
ALE	54151@uc007wli.1-uc007wlj.1@uc007wlf.1	Cyhr1	-0.233333	0.0766667	0.0142	0.0454	0.270954	0.210079
ALE	13175@uc008pgk.1@uc008pgl.1-uc008pgm.1-uc008pgp.1-uc008pgq.1-uc008pgr.1	Dclk1	-0.0166667	0.0666667	0.0316	0.0104	0.270954	0.197339
ALE	13175@uc008pgk.1@uc008pgo.1	Dclk1	0.0766667	-0.316667	0.0472	0.0126	0.272618	0.197339
ALE	22791@uc008wpb.1@uc008woz.1-uc008wpa.1	Dnajc2	0.263333	-0.0633333	0.0154	0.0378	0.270954	0.201956
ALE	224613@uc008ati.1-uc008atj.1@uc008ath.1	Flywch1	-0.0666667	0.03	0.0126	0.0342	0.270954	0.201052
ALE	320806@uc007rnu.1-uc007roa.1-uc007rob.1@uc007rnv.1	Gfm2	0.18	-0.153333	0.0356	0.0226	0.270954	0.197339
ALE	14681@uc009mvk.1@uc009mvl.1	Gnao1	-0.0233333	0.01	0.0466	0.0318	0.272618	0.200996
ALE	16993@uc007guq.1@uc007gur.1	Lta4h	0.0566667	-0.03	0.0464	0.0202	0.272618	0.197339
ALE	18027@uc008ttt.1@uc008ttq.1-uc008tts.1-uc008ttu.1-uc008ttv.1-uc008ttw.1	Nfia	0.0833333	-0.156667	0.0386	0.022	0.270954	0.197339
ALE	74164@uc008sid.1@uc008sie.1	Nfx1	0.143333	-0.0566667	0.0134	0.0342	0.270954	0.201052
ALE	269966@uc009irc.1@uc009iqx.1	Nup98	0.14	-0.0466667	0.0232	0.0326	0.270954	0.200996
ALE	83679@uc008qpg.1@uc008qpe.1	Pde4dip	0.0433333	-0.173333	0.0372	0.0174	0.270954	0.197339
ALE	101471@uc009kkd.1@uc009kkb.1-uc009kkc.1-uc009kke.1-uc009kkf.1	Phrf1	0.22	-0.02	0.042	0.0196	0.272618	0.197339
ALE	70470@uc008npl.1@uc008npn.1	Rprd1b	-0.1	0.04	0.0368	0.0362	0.270954	0.201956
ALE	98366@uc007ami.1@uc007amg.1-uc007amh.1	Smap1	-0.04	0.0333333	0.0282	0.0364	0.270954	0.201956
ALE	68734@uc007otk.1@uc007otj.1	Smek1	0.186667	-0.183333	0.0194	0.0148	0.270954	0.197339
ALE	104871@uc007oqz.1@uc007ora.1-uc007orb.1	Spata7	0.183333	-0.0533333	0.0152	0.0364	0.270954	0.201956
ALE	72003@uc007sfz.1@uc007sfy.1-uc007sgb.1	Synpr	-0.0133333	0.0233333	0.0458	0.0182	0.272618	0.197339
ALE	104859@uc007pcf.1@uc007pcg.1-uc007pch.1	Tecpr2	-0.0266667	0.0166667	0.0178	0.0298	0.270954	0.200996
ALE	67095@uc009sde.1@uc009sdf.1	Trak1	-0.01	0.01	0.0304	0.0334	0.270954	0.201019
ALE	217449@uc007nga.1@uc007nfw.1-uc007nfx.1	Ttc15	0.0733333	-0.0166667	0.041	0.0136	0.272618	0.197339
ALE	78893@uc009rxv.1@uc009rxq.1	U6,Cnot10	-0.103333	0.04	0.0312	0.0308	0.270954	0.200996
ALE	22249@uc008spi.1@uc008spg.1	Unc13b	-0.0433333	0.0166667	0.0398	0.0316	0.270954	0.200996
ALE	104799@uc007ois.1@uc007oip.1-uc007oiq.1-uc007oir.1	Vipar	-0.07	0.03	0.038	0.0326	0.270954	0.200996
ALE	24116@uc008xbo.1@uc008xbn.1	Whsc2	0.09	-0.116667	0.0264	0.016	0.270954	0.197339
ALE	232341@uc009dmv.1@uc009dms.1-uc009dmt.1	Wnk1	-0.106667	0.18	0.0374	0.0248	0.270954	0.199272
ALE	68505@uc008ghd.1@uc008ghb.1	Zfpl1,1110014N23Rik,Tm7sf2	0.153333	-0.0933333	0.0238	0.0208	0.270954	0.197339
MXE	chr9:59519728:59519880:+@chr9:59522836:59523002:+@chr9:59523375:59523540:+@chr9:59525851:59526519:+	Pkm2	-0.17	0.0133333	0.015	0.0276	0.39	0.20608
SE	chr10:127929115:127929192:-@chr10:127928342:127928403:-@chr10:127927911:127928089:-	Myl6	0.04	-0.00666667	0.0194	0.0268	0.1984	0.268364
SE	chr10:127929115:127929192:-@chr10:127928776:127928820:-@chr10:127927911:127928089:-	Myl6	0.183333	-0.0433333	0.0462	0.0318	0.213943	0.268364
SE	chr10:126918370:126918850:+@chr10:126919555:126919663:+@chr10:126921032:126921274:+	R3hdm2	0.0533333	-0.02	0.0238	0.0352	0.1984	0.268364
SE	chr10:90584952:90585076:-@chr10:90584667:90584788:-@chr10:90582272:90582451:-	Slc25a3	-0.0833333	0.0633333	0.0424	0.0286	0.213943	0.268364
